# Supplementary material for: Isolation and Characterization of Cat Olfactory Ecto-Mesenchymal Stem Cells
Source: MDPI journal article supplement (doi:10.3390/ani12101284), 2022-05-17
Supplement: s1 [file s1]

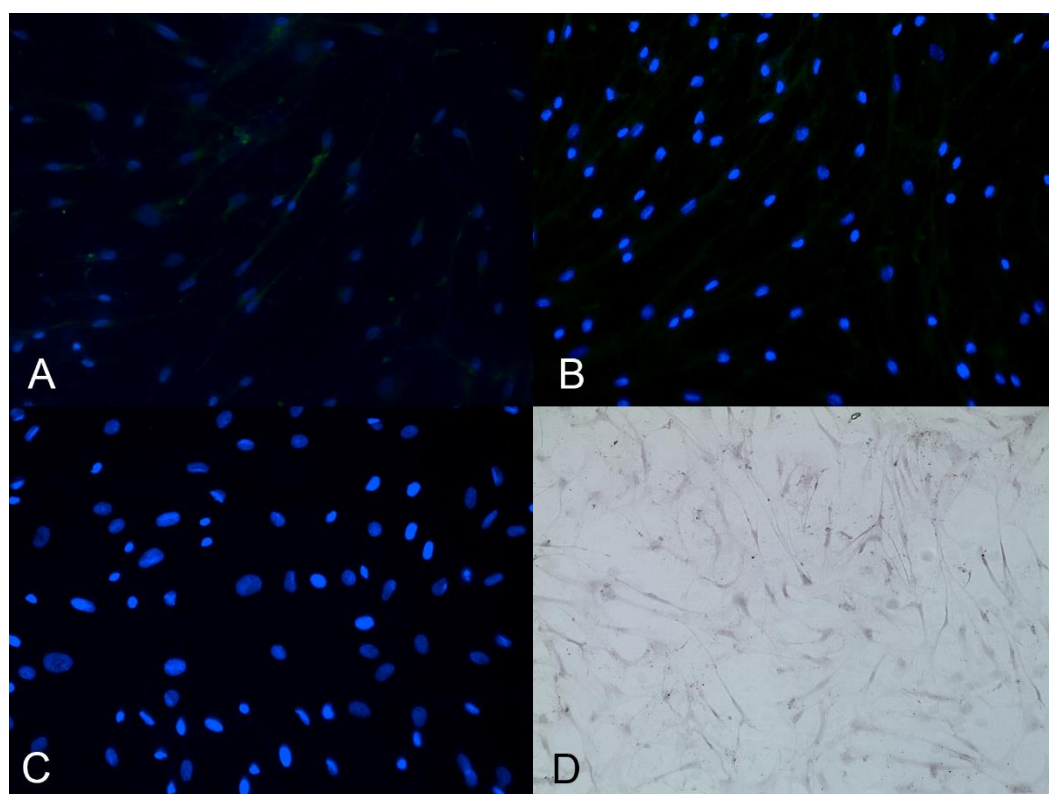

**Figure S1.** Negative controls of histochemical and immucytochemical analyses. Before neural differentiation, feline OE-MSC showed a basal weak positivity against GFAP (**a**) and MAP2 (**b**) (in green, ob. x 200). (**c**) No immunoreactivity was observed against tenomodulin (ob. x 200). (**d**) No positivity was observed in negative controls for Alizarin Red stain (ob. x 100).
